# Supplementary material
Source: MDPI journal article supplement (https://www.mdpi.com/2410-3888/7/6/396)
Supplement: s1 [file s1]

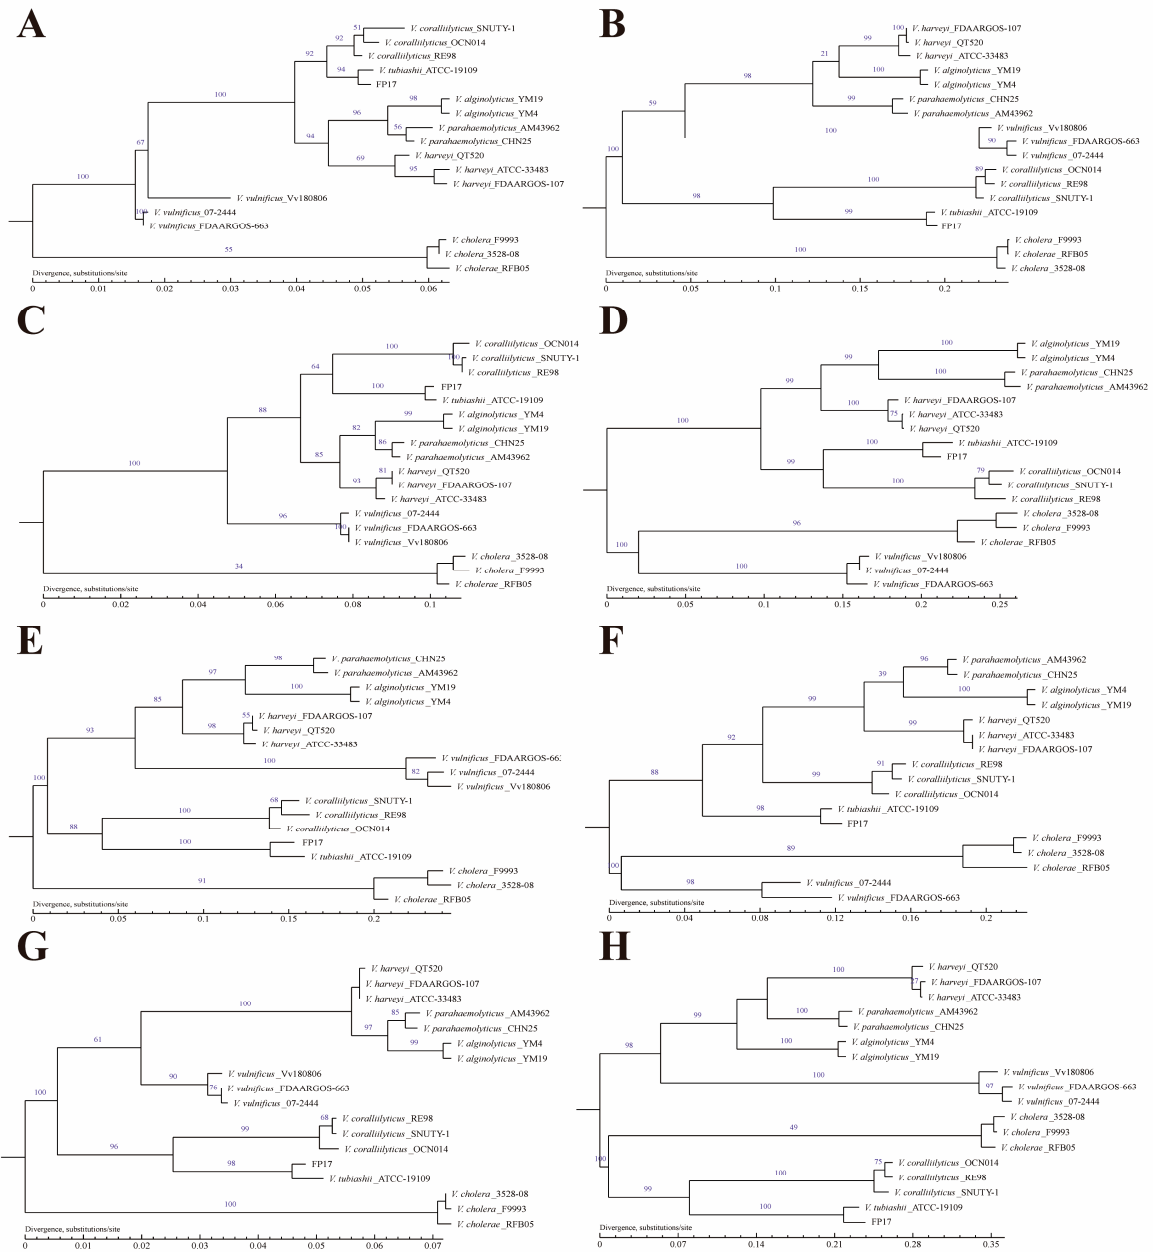

Figure S1. The neighbor-joining phylogenetic tree of *vibrio tubiashii* FP17 strain based on several housekeeping genes: 16S rRNA(A), *ftsZ*(B), *gapA*(C), *gyrB*(D), *mreB*(E), *pyrH*(F), *rpoA*(G) and *topA*(H).

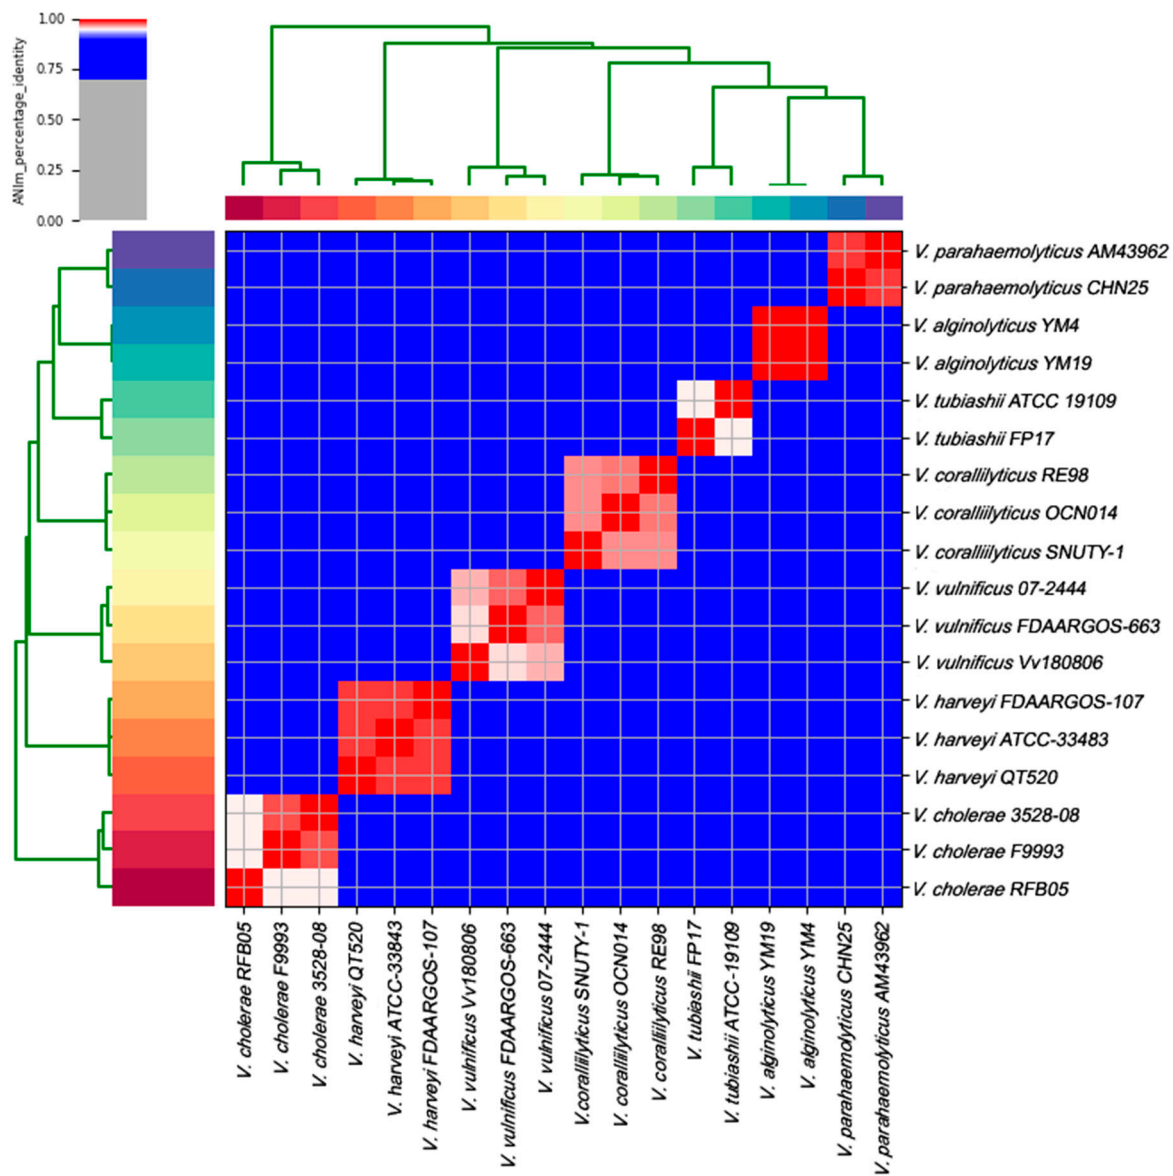

Figure S2. Average nucleotide identity (ANI) value between 17 *Vibrio* strains.

Table S1. Comparison of the chromosomal properties of *V. tubiashii* FP17, ATCC19019 and

ATCC19016 strain.

| Strain                 | FP17        | ATCC19109                                                        | ATCC19106     |
|------------------------|-------------|------------------------------------------------------------------|---------------|
| Genome size (bp)       | 5,261,336   | 5,540,337                                                        | 5,353,266     |
| GC content             | 45.8%       | 45.03%                                                           | 44.84%        |
| Annotated genes        | 4824        | 5080                                                             | 4950          |
| tRNA                   | 119         | 117                                                              | 86(total RNA) |
| rRNA                   | 31          | 31                                                               |               |
| Chromosome No.         | 2           | 2                                                                | 2             |
| Plasmid No.            | 1           | 4                                                                |               |
| GeneBank Accession No. | PRJNA792890 | CP009354, CP009355,<br>CP009356, CP009357,<br>CP009358, CP009359 |               |

Table S2. Information of prophage in FP17.

| Region | Region_length | Completeness | Score | Region_position      | GC     | Most Common Phage | Gene number |
|--------|---------------|--------------|-------|----------------------|--------|-------------------|-------------|
| 1      | 7.9Kb         | intact       | 95    | Chr1:1588633-1596535 | 43.33% | NC_016162         | 13          |
| 2      | 25.8Kb        | incomplete   | 40    | Chr1:1810631-1836501 | 43.77% | NC_009904         | 24          |
| 3      | 20.2Kb        | intact       | 122   | Chr2:808734-829014   | 43.06% | NC_016162         | 31          |
| 4      | 11.7Kb        | intact       | 109   | Plasmid1:44929-56721 | 44.86% | NC_016162         | 17          |

Table S3. Summary part of the antimicrobial resistant genes in FP17.

| Gene location     | Gene    | Identify% | Description                                                                           | Accession Number |
|-------------------|---------|-----------|---------------------------------------------------------------------------------------|------------------|
| chrI_orf00212     | crp     | 94.76     | Regulator that represses RND multidrug efflux pump                                    | AP009048.1       |
| chrI_orf01094     | tet(35) | 88.08     | Tetracycline resistance ABC efflux pump                                               | AF353562.1       |
| chrI_orf02634     | tufA    | 86.26     | Elfamycin resistant EF-Tu                                                             | AE014075.1       |
| chrI_orf02681     | tufA    | 86.26     | Elfamycin resistant EF-Tu                                                             | AH002539.2       |
| chrI_orf02674     | rpoB    | 85.02     | rifamycin-resistant beta-subunit of RNA polymerase                                    | BA000007.3       |
| chrI_orf02390     | parE    | 78.82     | Fluoroquinolone resistance                                                            | AE006468.2       |
| chrI_orf00314     | murA    | 78.47     | fosfomycin transferase                                                                | CP009072         |
| chrI_orf01598     | gyrA    | 77.29     | resistance to triclosan                                                               | AE006468.2       |
| chrI_orf00004     | gyrB    | 76.80     | fluoroquinolone resistant                                                             | AE006468.2       |
| chrII_orf04672    | catB9   | 75.98     | chloramphenicol acetyltransferase                                                     | AF462019         |
| chrI_orf02212     | PtsI    | 74.52     | phosphotransferase                                                                    | HG738867         |
| chrI_orf00168     | ugd     | 73.71     | pmr phosphoethanolamine transferase                                                   | U00096           |
| chrI_orf00654     | MexF    | 70.11     | multidrug resistance RND efflux pump                                                  | AE004091.2       |
| chrI_orf06119     | GlpT    | 69.85     | resistance to fosfomycin                                                              | HG738867         |
| chrI_orf02389     | parC    | 69.37     | fluoroquinolone resistant                                                             | AE006468.2       |
| chrI_orf02637     | rpsL    | 69.11     | resistance to Streptomycin                                                            | AE000516         |
| chrI_orf01840     | msbA    | 68.50     | multidrug resistance ABC efflux pump                                                  | U00096.3         |
| chrI_orf00490     | folP    | 61.77     | sulfonamide resistant dihydropteroate synthase                                        | U00096.3         |
| chrI_orf02635     | fusA    | 59.91     | resistance to fusidic acid                                                            | BX571856         |
| chrII_orf03778    | QnrVC1  | 57.87     | quinolone resistance protein                                                          | EU436855         |
| chrI_orf02825     | cya     | 55.46     | adenylate cyclase                                                                     | HG738867         |
| chrII_orf03882    | katG    | 54.60     | isoniazid resistant                                                                   | AL123456.3       |
| chrI_orf02673     | rpoC    | 54.41     | vancomycin-resistant beta prime subunit of RNA polymerase                             | CP010905.2       |
| chrI_orf00386     | dfrA3   | 52.80     | trimethoprim resistant dihydrofolate reductase                                        | J03306           |
| PlasmidI_orf02995 | catB9   | 51.87     | chloramphenicol acetyltransferase                                                     | AF462019         |
| chrI_orf02359     | LpxC    | 51.85     | Acinetobacter mutant Lpx gene conferring resistance to colistin                       | CP010781.1       |
| chrI_orf01882     | macB    | 51.80     | multidrug resistance ABC efflux pump                                                  | AY768532         |
| chrI_orf00653     | MexE    | 50.26     | multidrug resistance RND efflux pump                                                  | AE004091.2       |
| chrI_orf02884     | mexW    | 49.56     | multidrug resistance RND efflux pump                                                  | NC_002516.2      |
| chrI_orf00564     | fusA    | 47.82     | resistance to fusidic acid                                                            | BX571856         |
| chrI_orf02699     | cpxA    | 47.38     | multidrug resistance RND efflux pump                                                  | BA000007.3       |
| chrI_orf02270     | LpxA    | 47.15     | Acinetobacter mutant Lpx gene conferring resistance to colistin                       | CP010781.1       |
| chrI_orf00485     | OmpU    | 47.06     | General Bacterial Porin with reduced permeability to peptide antibiotics              | KJ699300         |
| chrI_orf02395     | tolC    | 46.19     | multidrug resistance ABC efflux pump                                                  | FJ768952         |
| chrI_orf02698     | CpxR    | 45.82     | multidrug resistance RND efflux pump                                                  | LT673656.1       |
| chrI_orf01522     | hmrM    | 45.58     | multidrug resistance MATE efflux pump                                                 | CP002276.1       |
| chrI_orf02370     | PBP3    | 45.46     | Penicillin-binding protein mutations conferring resistance to beta-lactam antibiotics | L42023.1         |
| chrI_orf02003     | rpsA    | 44.21     | pyrazinamide resistant                                                                | AL123456.3       |
| chrI_orf00518     | ileS    | 42.55     | antibiotic resistant isoleucyl-tRNA synthetase                                        | X74219           |

Table S4. Antimicrobial susceptibility of *V. tubiashii* FP17. (Sensitivity: S=sensitive, M= moderately sensitive, R=resistant).

| Antimicrobial agent        | Concentration<br>(µg/tablet) | Diameter of inhibition<br>zone (mm) | Sensitivity |
|----------------------------|------------------------------|-------------------------------------|-------------|
| Chloromycetin              | 30                           | 29                                  | S           |
| Florfenicol                | 30                           | 28                                  | S           |
| Cefoperazone               | 75                           | 25                                  | S           |
| Ciprofloxacin              | 5                            | 25                                  | S           |
| Carbenicillin              | 100                          | 23                                  | S           |
| Ampicillin                 | 10                           | 21                                  | S           |
| Norfloxacin                | 10                           | 18                                  | S           |
| Gentamicin                 | 10                           | 17                                  | S           |
| Polymyxin B                | 300                          | 12                                  | S           |
| Enrofloxacin               | 10                           | 24                                  | M           |
| Cotrimoxazole<br>(SMZ/TMP) | 23.75/1.25                   | 21                                  | M           |
| Piperacillin               | 100                          | 20                                  | M           |
| Ceftriaxone                | 30                           | 19                                  | M           |
| Cefuroxim                  | 30                           | 18                                  | M           |
| Furazolidone               | 300                          | 16                                  | M           |
| Ofloxacin                  | 5                            | 15                                  | M           |
| Penicillin                 | 10 (U)                       | 16                                  | R           |
| Cefazolin                  | 30                           | 13.5                                | R           |
| Amikacin                   | 30                           | 13                                  | R           |
| Minocycline                | 30                           | 13                                  | R           |
| Rifampicin                 | 5                            | 13                                  | R           |
| Kanamycin                  | 30                           | 12                                  | R           |
| Neomycin                   | 30                           | 11                                  | R           |
| Amoxicillin                | 25                           | 11                                  | R           |
| Tetracycline               | 30                           | 10                                  | R           |
| Erythromycin               | 15                           | 10                                  | R           |
| Cephalexin                 | 30                           | 10                                  | R           |
| Doxycycline                | 30                           | 10                                  | R           |
| Ceftazidime                | 30                           | 7                                   | R           |
| Cefradine                  | 30                           | 7                                   | R           |
| Clindamycin                | 2                            | 7                                   | R           |
| Midecamycin                | 30                           | 7                                   | R           |
| Oxacillin                  | 1                            | 7                                   | R           |
| Vancomycin                 | 30                           | 7                                   | R           |
